# Supplementary material
Source: PubMed Central journal article supplement (PMC6990636)
Supplement: ao9b04004_si_001.pdf [file ao9b04004_si_001.pdf]

## **Supporting information**

### **Solubility Measurement and Various Solubility Parameters of Glipizide in Different Neat Solvents**

Mohd Abul Kalam<sup>a</sup>, Aws Alshamsan<sup>a</sup>, Musaed Alkholief<sup>a</sup>, Ibrahim A. Alsarra<sup>b</sup>, Raisuddin Ali<sup>b</sup>, Nazrul Haq<sup>b</sup>, Md Khalid Anwer<sup>c</sup> and Faiyaz Shakeel<sup>\*b</sup>

<sup>a</sup>Nanobiotechnology Unit, Department of Pharmaceutics, College of Pharmacy, King Saud University, P.O. Box: 2457, Riyadh 11451, Saudi Arabia

<sup>b</sup>Department of Pharmaceutics, College of Pharmacy, King Saud University, P.O. Box: 2457, Riyadh 11451, Saudi Arabia

<sup>c</sup>Department of Pharmaceutics, College of Pharmacy, Prince Sattam bin Abdulaziz University, Al-Kharj, Saudi Arabia

#### **\*Corresponding Author:**

Dr. Faiyaz Shakeel

Department of Pharmaceutics, College of Pharmacy,

King Saud University, Riyadh, Saudi Arabia

Email: [faiyazs@fastmail.fm](mailto:faiyazs@fastmail.fm)

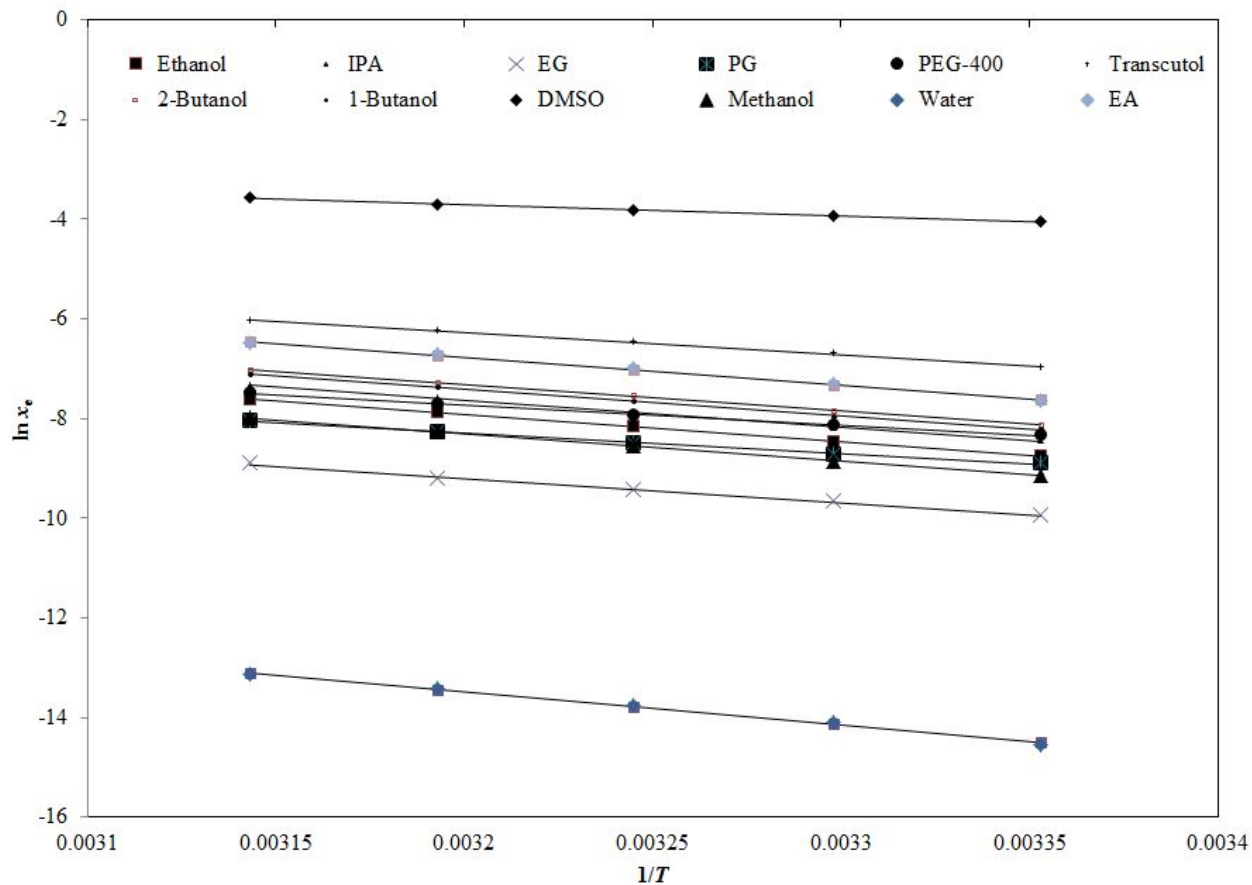

**Figure S1: Correlation of  $\ln x_e$  values of GLZ with “van’t Hoff model” in twelve different neat solvents as a function of  $1/T$ ; symbols represent the experimental solubilities of GLZ and solid lines represent the solubilities of GLZ calculated by “van’t Hoff model”**

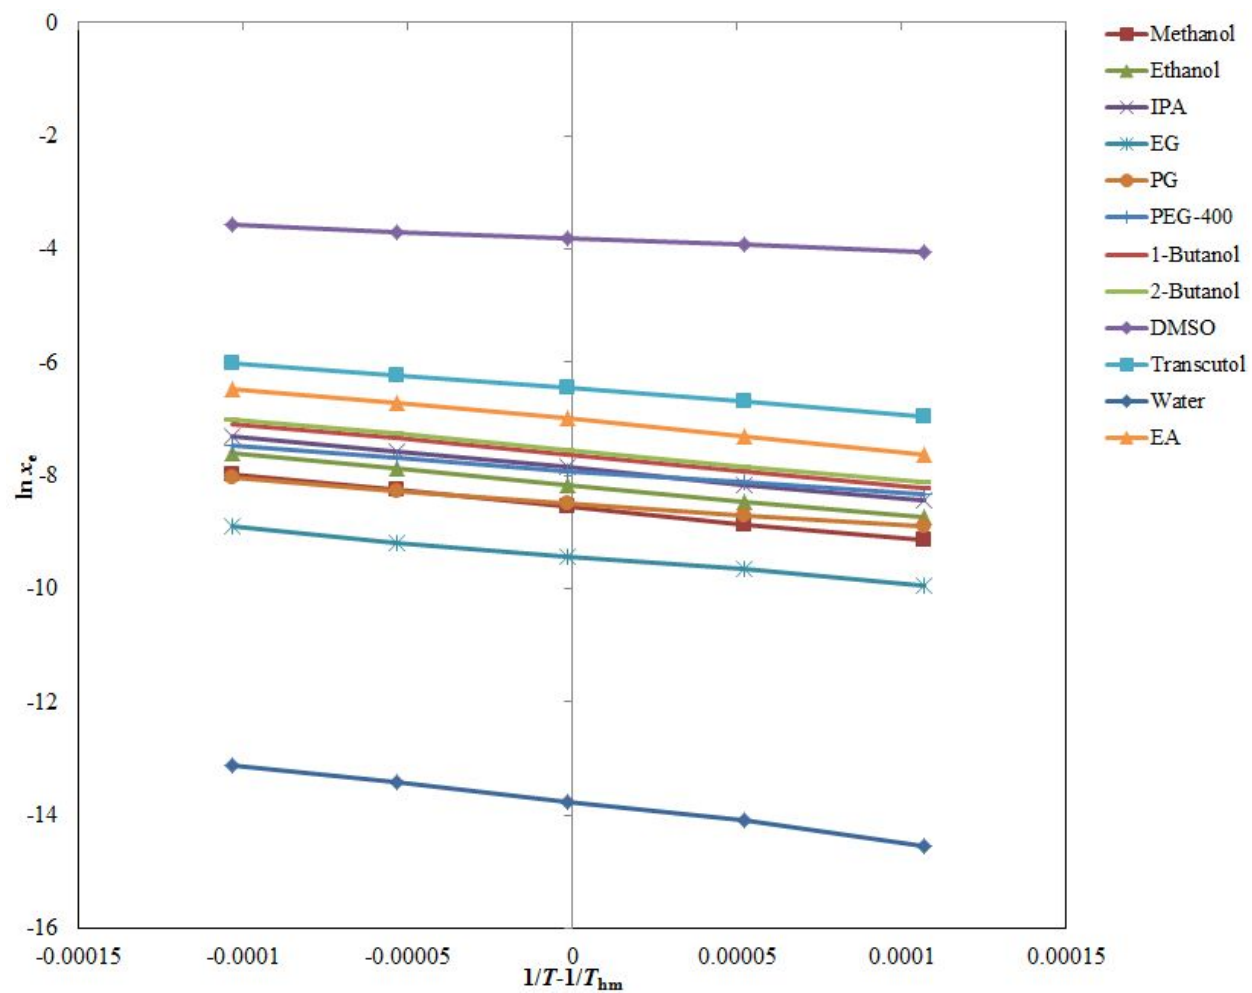

**Figure S2: van't Hoff plots for GLZ plotted between  $\ln x_e$  and  $1/T - 1/T_{hm}$  for GLZ in twelve different neat solvents**

**Table S1: Materials used in the solubility experiment of GLZ**

| Materials | Molecular formula                                               | Molar mass (g mol <sup>-1</sup> ) | CAS Registry no. | Purification method | Mass fraction purity | Analysis method | Source       |
|-----------|-----------------------------------------------------------------|-----------------------------------|------------------|---------------------|----------------------|-----------------|--------------|
| GLZ       | C <sub>21</sub> H <sub>27</sub> O <sub>4</sub> N <sub>5</sub> S | 445.53                            | 29094-61-9       | None                | 0.980                | HPLC            | E-Merck      |
| Ethanol   | C <sub>2</sub> H <sub>5</sub> OH                                | 46.07                             | 64-17-5          | None                | 0.999                | GC              | E-Merck      |
| THP       | C <sub>6</sub> H <sub>14</sub> O <sub>3</sub>                   | 134.17                            | 111-90-0         | None                | 0.999                | GC              | Gattefosse   |
| EG        | C <sub>2</sub> H <sub>6</sub> O <sub>2</sub>                    | 62.07                             | 107-21-1         | None                | 0.996                | GC              | E-Merck      |
| PG        | C <sub>3</sub> H <sub>8</sub> O <sub>2</sub>                    | 76.09                             | 57-55-6          | None                | 0.995                | GC              | E-Merck      |
| PEG-400   | H(OCH <sub>2</sub> CH <sub>2</sub> ) <sub>n</sub> OH            | 400                               | 25322-68-3       | None                | 0.999                | HPLC            | E-Merck      |
| IPA       | C <sub>3</sub> H <sub>8</sub> O                                 | 60.10                             | 67-63-0          | None                | 0.997                | GC              | E-Merck      |
| EA        | C <sub>2</sub> H <sub>6</sub> OS                                | 88.11                             | 141-78-6         | None                | 0.997                | GC              | E-Merck      |
| 1-Butanol | C <sub>4</sub> H <sub>10</sub> O                                | 74.12                             | 71-36-3          | None                | 0.999                | GC              | E-Merck      |
| 2-Butanol | C <sub>4</sub> H <sub>10</sub> O                                | 74.12                             | 78-92-2          | None                | 0.999                | GC              | E-Merck      |
| DMSO      | C <sub>2</sub> H <sub>6</sub> OS                                | 78.13                             | 67-68-5          | None                | 0.990                | GC              | E-Merck      |
| Methanol  | CH <sub>3</sub> OH                                              | 32.04                             | 67-56-1          | None                | 0.998                | GC              | BDH PROLABO® |
| Water     | H <sub>2</sub> O                                                | 18.07                             | 7732-18-5        | None                | -                    | -               | Milli-Q      |

Both the analysis method and purity of materials were provided by supplier of each material
